# Supplementary material
Source: PubMed Central journal article supplement (PMC4679352)
Supplement: thnov06p0028s1.pdf [file thnov06p0028s1.pdf]

## SUPPLEMENTARY MATERIALS

**Table S1: LC Bead® elastic modulus**

| Bead Size ( $\mu\text{m}$ ) | Elastic modulus $\pm$ SD (MPa) |
|-----------------------------|--------------------------------|
| 40-90                       | 0.32 $\pm$ 0.18                |
| 70-150                      | 0.14 $\pm$ 0.03                |
| 100-300                     | 0.11 $\pm$ 0.02                |
| 300-500                     | 0.10 $\pm$ 0.01                |

**Table S2: Suspension times of 70 – 150  $\mu\text{m}$  RO Beads in various contrast agents (N=10).**

| Contrast Agent | Brand Name    | Density (g/mL) (20°C / 37°C) | Viscosity (cP) (20°C / 37°C) | Suspension Time (min $\pm$ SD) |
|----------------|---------------|------------------------------|------------------------------|--------------------------------|
| Iopamidol 300  | Isovue 300    | - / 1.330                    | 4.7 / 8.8                    | 1.04 $\pm$ 0.14                |
| Iomeprol 300   | Iomeron 300   |                              | 4.5 / 8.1                    | 0.9 $\pm$ 0.06                 |
| Iomeprol 400   | Iomeron 400   |                              | 27.5 / 12.6                  | 50.4 $\pm$ 4.58                |
| Iodixanol 320  | Visipaque 320 | 1.369 / 1.356                | 26.8 / 11.8                  | 8.97 $\pm$ 1.32                |
| Iodixanol 270  | Visipaque 270 | 1.314 / 1.303                | 12.7 / 6.3                   | 2.88 $\pm$ 0.12                |
| Iohexol 350    | Omnipaque 350 | - / 1.406                    | 23.3 / 10.4                  | 3.7 $\pm$ 0.32                 |

**Table S3: Suspension times of various size of RO beads in iodixanol 320 (N=10).**

| Bead Size ( $\mu\text{m}$ ) | Iodixanol Suspension Times (min $\pm$ SD) |
|-----------------------------|-------------------------------------------|
| 40-90                       | 31.16 $\pm$ 2.08                          |
| 70-150                      | 8.97 $\pm$ 1.32                           |
| 100-300                     | 9.01 $\pm$ 0.91                           |
| 300-500                     | 0.61 $\pm$ 0.02                           |

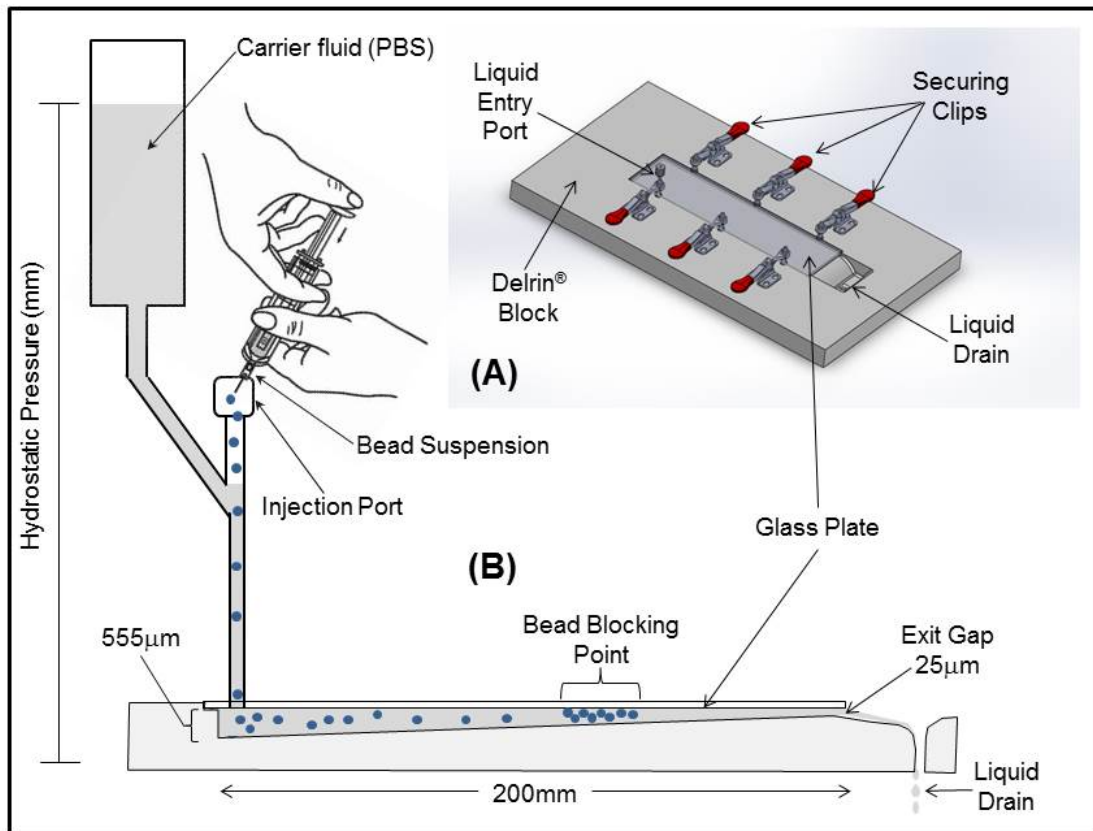

Figure S1: Penetration plate schematic. A) A glass plate was mounted over a gradient machined into a sheet of Delrin. B) Fluid flows from the carrier reservoir to narrow end of the gradient. Beads are trapped according to their size and mechanical properties.
